# Supplementary material
Source: PubMed Central journal article supplement (PMC5145274)
Supplement: NIHMS829776-supplement-Supplemental_Material.pdf [file NIHMS829776-supplement-Supplemental_Material.pdf]

# **From Visual Exploration to Storytelling and Back Again**

**Supplementary Material**

# Gapminder Usage Scenario

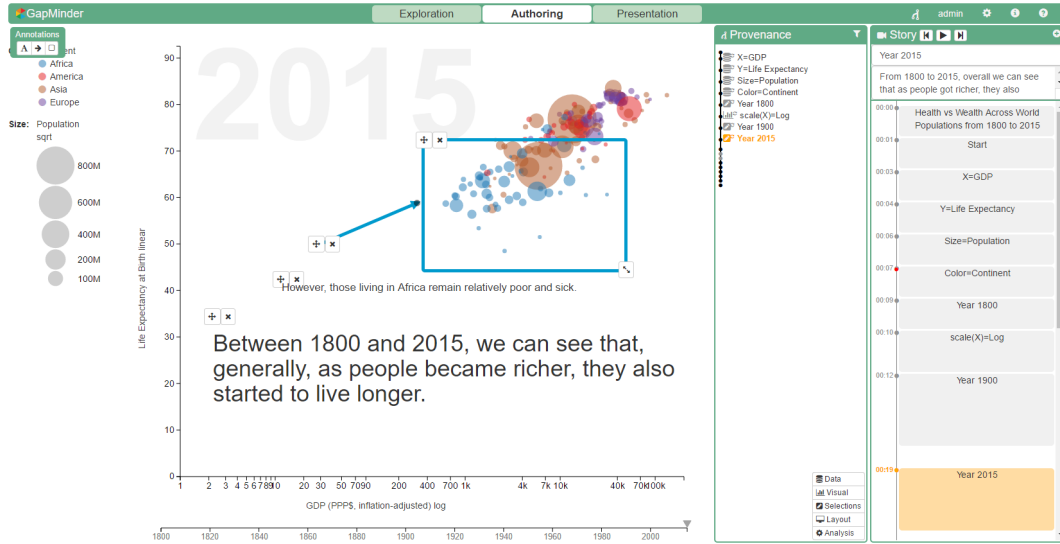

**Figure S1:** Screenshot of the Gapminder-inspired application showing the same state as the usage scenario in authoring mode.  
**Vistory:** <http://vistories.org/v/gapminderA>.

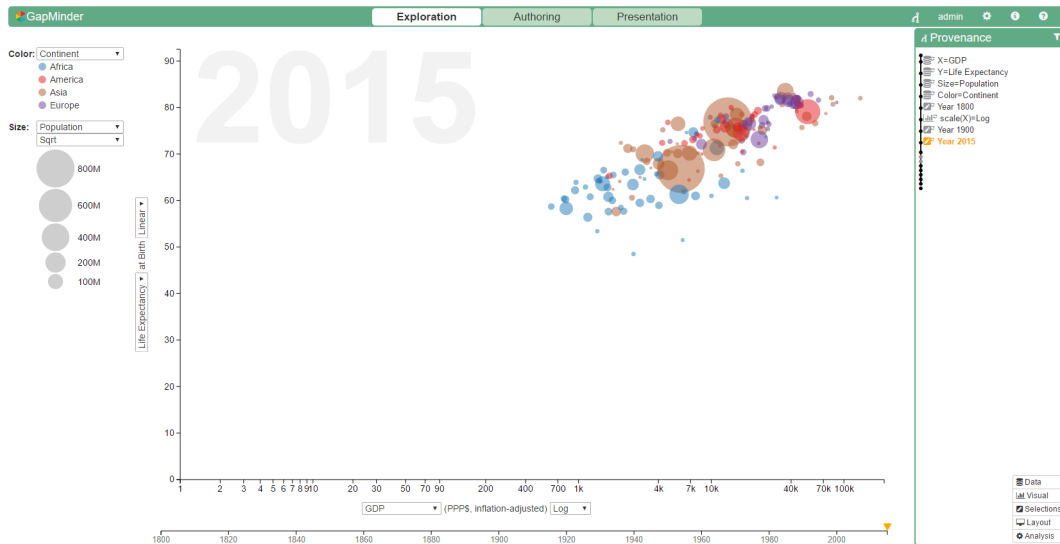

**Figure S2:** Screenshot of the Gapminder-inspired application showing the same state as the usage scenario in exploration mode.  
**Vistory:** <http://vistories.org/v/gapminderE>.

# Gapminder Supplementary Figures

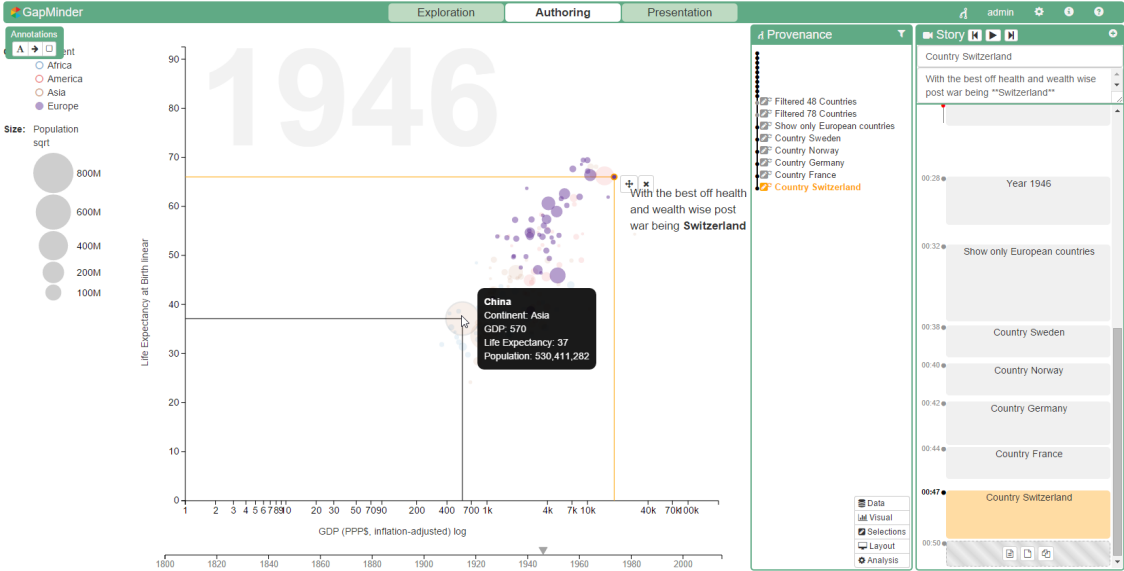

**Figure S3:** Screenshot of the Gapminder-inspired application in authoring mode showing the combination of selection with annotation and custom mouse interaction.

**Vistory:** <http://vistories.org/v/gapminderTooltip>.
